# Supplementary material
Source: HighWire-hosted journal article supplement (https://jnm.snmjournals.org/highwire/filestream/94148/field_highwire_adjunct_files/0/Supplemental_Data.pdf)
Supplement: Supplemental_Data.pdf [file Supplemental_Data.pdf]

Supplemental Table 1: Basic statistics for the compartment variables and the influx (inf). var xx min+60:

dynamic data from 0-xx min and 60 minute SUV; var xx: dynamic data from 0-xx min.

| <b>variable</b> | <b>mean</b> | <b>median</b> | <b>minimum</b> | <b>maximum</b> |
|-----------------|-------------|---------------|----------------|----------------|
| vb 60 min       | 0.0971      | 0.0814        | 0.0000         | 0.5969         |
| k1 60 min       | 0.3991      | 0.3565        | 0.0000         | 1.0000         |
| k3 60 min       | 0.0680      | 0.0614        | 0.0000         | 0.3423         |
| vb 30 min+60    | 0.0963      | 0.0800        | 0.0000         | 0.5842         |
| k1 30 min+60    | 0.3984      | 0.3555        | 0.0000         | 1.0000         |
| k3 30 min+60    | 0.0676      | 0.0614        | 0.0000         | 0.3399         |
| vb 30 min       | 0.0961      | 0.0801        | 0.0000         | 0.5773         |
| k1 30 min       | 0.3986      | 0.3545        | 0.0000         | 1.0000         |
| k3 30 min       | 0.0669      | 0.0609        | 0.0000         | 0.3388         |
| vb 25 min+60    | 0.0959      | 0.0792        | 0.0000         | 0.5974         |
| k1 25 min+60    | 0.3983      | 0.3572        | 0.0000         | 1.0000         |
| k3 25 min+60    | 0.0675      | 0.0616        | 0.0000         | 0.3371         |
| vb 25 min       | 0.0962      | 0.0800        | 0.0000         | 0.5642         |
| k1 25 min       | 0.3987      | 0.3540        | 0.0000         | 1.0000         |
| k3 25 min       | 0.0667      | 0.0614        | 0.0000         | 0.3424         |
| vb 20 min+60    | 0.0961      | 0.0790        | 0.0000         | 0.6220         |
| k1 20 min+60    | 0.3987      | 0.3573        | 0.0000         | 1.0000         |
| k3 20 min+60    | 0.0674      | 0.0615        | 0.0000         | 0.3364         |
| vb 20 min       | 0.0975      | 0.0816        | 0.0000         | 0.5483         |
| k1 20 min       | 0.3994      | 0.3563        | 0.0000         | 1.0000         |
| k3 20 min       | 0.0654      | 0.0599        | 0.0000         | 0.3734         |
| vb 16 min+60    | 0.0978      | 0.0819        | 0.0000         | 0.5525         |
| k1 16 min+60    | 0.3980      | 0.3536        | 0.0000         | 1.0000         |
| k3 16 min+60    | 0.0667      | 0.0613        | 0.0000         | 0.3625         |
| vb 16 min       | 0.0962      | 0.0800        | 0.0000         | 0.5642         |
| k1 16 min       | 0.3987      | 0.3540        | 0.0000         | 1.0000         |
| k3 16 min       | 0.0667      | 0.0614        | 0.0000         | 0.3424         |
| vb 10 min+60    | 0.0966      | 0.0788        | 0.0000         | 0.6549         |
| k1 10 min+60    | 0.3983      | 0.3519        | 0.0000         | 1.0000         |
| k3 10 min+60    | 0.0701      | 0.0667        | 0.0000         | 0.3515         |
| vb 10 min       | 0.0973      | 0.0813        | 0.0000         | 0.5457         |
| k1 10 min       | 0.3993      | 0.3529        | 0.0000         | 1.0000         |
| k3 10 min       | 0.0644      | 0.0631        | 0.0000         | 0.3425         |
| inf 60 min      | 0.0369      | 0.0269        | 0.0000         | 0.4993         |
| inf 30 min+60   | 0.0355      | 0.0292        | 0.0000         | 0.3994         |
| inf 30 min      | 0.0348      | 0.0285        | 0.0000         | 0.3581         |
| inf 25 min+60   | 0.0349      | 0.0283        | 0.0000         | 0.3638         |
| inf 25 min      | 0.0348      | 0.0286        | 0.0000         | 0.3604         |
| inf 20 min+60   | 0.0357      | 0.0287        | 0.0000         | 0.3791         |
| inf 20 min      | 0.0349      | 0.0286        | 0.0000         | 0.3573         |
| inf 16 min+60   | 0.0351      | 0.0289        | 0.0000         | 0.3349         |
| inf 16 min      | 0.0350      | 0.0282        | 0.0000         | 0.3619         |
| inf 10 min+60   | 0.0348      | 0.0279        | 0.0000         | 0.3402         |
| inf 10 min      | 0.0350      | 0.0286        | 0.0000         | 0.3310         |

Supplemental Table 2: Correlation coefficients and squares of the correlation coefficients for dPET (dynamic acquisition for 0-x minutes) and the combination of dPET and 60 minutes uptake data. The results of the full dynamic series for 60 minutes are taken for reference.

| <b>parameters</b> | <b>acquisition times (minutes)</b> | <b>dPET and 60 minute data (correlation)</b> | <b>dPET and 60 minute data (variance)</b> | <b>dPET (correlation)</b> | <b>dPET (variance)</b> |
|-------------------|------------------------------------|----------------------------------------------|-------------------------------------------|---------------------------|------------------------|
| inf               | 0-30                               | 0.8753                                       | 0.7662                                    | 0.8638                    | 0.7462                 |
| vb                | 0-30                               | 0.9749                                       | 0.9504                                    | 0.9761                    | 0.9528                 |
| k1                | 0-30                               | 0.9987                                       | 0.9974                                    | 0.9982                    | 0.9964                 |
| k3                | 0-30                               | 0.9774                                       | 0.9553                                    | 0.9414                    | 0.8862                 |
| inf               | 0-25                               | 0.8656                                       | 0.7453                                    | 0.8635                    | 0.75                   |
| vb                | 0-25                               | 0.9824                                       | 0.9651                                    | 0.9745                    | 0.9497                 |
| k1                | 0-25                               | 0.9985                                       | 0.9970                                    | 0.9977                    | 0.9954                 |
| k3                | 0-25                               | 0.9678                                       | 0.9366                                    | 0.9196                    | 0.8457                 |
| inf               | 0-20                               | 0.8628                                       | 0.7444                                    | 0.8648                    | 0.7479                 |
| vb                | 0-20                               | 0.9876                                       | 0.9754                                    | 0.9803                    | 0.9610                 |
| k1                | 0-20                               | 0.9980                                       | 0.9960                                    | 0.9972                    | 0.9944                 |
| k3                | 0-20                               | 0.9561                                       | 0.9141                                    | 0.9054                    | 0.8197                 |
| inf               | 0-16                               | 0.8552                                       | 0.7314                                    | 0.8532                    | 0.7280                 |
| vb                | 0-16                               | 0.9830                                       | 0.9663                                    | 0.9745                    | 0.9497                 |
| k1                | 0-16                               | 0.9967                                       | 0.9934                                    | 0.9977                    | 0.9954                 |
| k3                | 0-16                               | 0.9029                                       | 0.8152                                    | 0.9196                    | 0.8457                 |
| inf               | 0-10                               | 0.8347                                       | 0.6967                                    | 0.8196                    | 0.6717                 |
| vb                | 0-10                               | 0.9695                                       | 0.9399                                    | 0.9787                    | 0.9579                 |
| k1                | 0-10                               | 0.9923                                       | 0.9847                                    | 0.9881                    | 0.9763                 |
| k3                | 0-10                               | 0.8620                                       | 0.7430                                    | 0.7489                    | 0.5609                 |
